# Supplementary material for: Mapping the patterns of cortical thickness in single- and multiple-domain amnestic mild cognitive impairment patients: a pilot study
Source: publisher site journal article supplement (doi:10.18632/aging.102362), 2019-11-22
Supplement: Supplementary file [file aging-v11i22-102362-supplementary-material-SD1.pdf]

**SUPPLEMENTARY TABLES**

**Supplementary Table 1. One-way ANOVA with Tukey’s multiple comparison results. The above one is left hemisphere and the below one is right hemisphere.**

|                        | one-way ANOVA |         | Tukey’s multiple comparison |                 |             |                     |                 |                 |
|------------------------|---------------|---------|-----------------------------|-----------------|-------------|---------------------|-----------------|-----------------|
|                        | F value       | p value | AD vs<br>aMCI-m             | AD vs<br>aMCI-s | AD vs<br>NC | aMCI-m vs<br>aMCI-s | aMCI-m<br>vs NC | aMCI-s<br>vs NC |
| caudal middle frontal  | 5.95          | < 0.01  | 0.05                        | 0.09            | < 0.01*     | 0.97                | 0.31            | 0.10            |
| entorhinal             | 6.56          | < 0.01  | 0.12                        | 0.01*           | < 0.01*     | 0.81                | 0.12            | 0.41            |
| fusiform               | 12.48         | < 0.01  | 0.04*                       | < 0.01*         | < 0.01*     | 0.23                | 0.01*           | 0.40            |
| inferior parietal      | 5.09          | < 0.01  | 0.08                        | 0.04*           | < 0.01*     | > 0.99              | 0.42            | 0.44            |
| inferior temporal      | 8.01          | < 0.01  | 0.06                        | < 0.01*         | < 0.01*     | 0.62                | 0.12            | 0.59            |
| isthmus cingulate      | 8.44          | < 0.01  | 0.07                        | < 0.01*         | < 0.01*     | 0.71                | 0.06            | 0.30            |
| lateral orbitofrontal  | 5.80          | < 0.01  | 0.32                        | 0.02*           | < 0.01*     | 0.67                | 0.08            | 0.42            |
| lingual                | 5.76          | < 0.01  | 0.29                        | 0.04*           | < 0.01*     | 0.83                | 0.07            | 0.27            |
| medial orbitofrontal   | 4.01          | 0.01    | 0.15                        | 0.23            | < 0.01*     | 0.98                | 0.48            | 0.22            |
| middle temporal        | 12.48         | < 0.01  | 0.15                        | < 0.01*         | < 0.01*     | 0.10                | < 0.01*         | 0.32            |
| parahippocampal        | 4.05          | 0.01    | 0.92                        | 0.66            | 0.01*       | 0.96                | 0.04*           | 0.07            |
| pars opercularis       | 5.77          | < 0.01  | 0.13                        | 0.02*           | < 0.01*     | 0.90                | 0.19            | 0.43            |
| pars triangularis      | 6.43          | < 0.01  | 0.37                        | < 0.01*         | < 0.01*     | 0.30                | 0.07            | 0.74            |
| precuneus              | 5.22          | < 0.01  | 0.14                        | 0.02*           | < 0.01*     | 0.85                | 0.30            | 0.68            |
| rostral middle frontal | 4.84          | < 0.01  | 0.83                        | 0.24            | < 0.01*     | 0.72                | 0.03*           | 0.16            |
| superior frontal       | 3.05          | 0.03    | 0.47                        | 0.36            | 0.01*       | > 0.99              | 0.23            | 0.22            |
| superior temporal      | 7.92          | < 0.01  | 0.59                        | 0.03*           | < 0.01*     | 0.36                | < 0.01*         | 0.13            |
| insula                 | 6.07          | < 0.01  | 0.07                        | < 0.01*         | < 0.01*     | 0.83                | 0.33            | 0.74            |

  

|                        | one-way ANOVA |         | Tukey’s multiple comparison |                 |             |                     |                 |                 |
|------------------------|---------------|---------|-----------------------------|-----------------|-------------|---------------------|-----------------|-----------------|
|                        | F value       | p value | AD vs<br>aMCI-m             | AD vs<br>aMCI-s | AD vs<br>NC | aMCI-m vs<br>aMCI-s | aMCI-m<br>vs NC | aMCI-s<br>vs NC |
| caudal middle frontal  | 4.36          | < 0.01  | 0.24                        | 0.55            | < 0.01*     | 0.89                | 0.29            | 0.06            |
| entorhinal             | 8.34          | < 0.01  | 0.25                        | < 0.01*         | < 0.01*     | 0.11                | 0.05            | 0.93            |
| fusiform               | 12.15         | < 0.01  | 0.05*                       | < 0.01*         | < 0.01*     | 0.42                | 0.01*           | 0.13            |
| inferior parietal      | 4.10          | 0.01    | 0.76                        | 0.60            | < 0.01*     | > 0.99              | 0.07            | 0.07            |
| inferior temporal      | 4.11          | 0.01    | 0.99                        | 0.22            | 0.03*       | 0.32                | 0.03*           | 0.44            |
| isthmus cingulate      | 3.20          | 0.03    | 0.35                        | 0.73            | 0.02*       | 0.86                | 0.48            | 0.11            |
| lateral orbitofrontal  | 2.98          | 0.04    | 0.89                        | 0.59            | 0.03*       | 0.96                | 0.12            | 0.23            |
| lingual                | 4.71          | < 0.01  | 0.13                        | 0.07            | < 0.01*     | > 0.99              | 0.34            | 0.33            |
| medial orbitofrontal   | 4.23          | < 0.01  | 0.31                        | 0.66            | < 0.01*     | 0.87                | 0.27            | 0.05*           |
| middle temporal        | 3.98          | 0.01    | 0.86                        | 0.32            | < 0.01*     | 0.79                | 0.05            | 0.23            |
| parahippocampal        | 3.70          | 0.02    | 0.95                        | 0.91            | 0.02*       | > 0.99              | 0.06            | 0.04*           |
| pars opercularis       | 4.07          | 0.01    | 0.38                        | 0.29            | < 0.01*     | > 0.99              | 0.19            | 0.16            |
| precuneus              | 5.73          | < 0.01  | 0.45                        | 0.25            | < 0.01*     | > 0.99              | 0.04*           | 0.04*           |
| rostral middle frontal | 3.42          | 0.02    | 0.55                        | 0.50            | 0.01*       | > 0.99              | 0.22            | 0.15            |
| superior frontal       | 3.45          | 0.02    | 0.61                        | 0.43            | 0.01*       | > 0.99              | 0.17            | 0.19            |
| superior temporal      | 4.16          | 0.01    | 0.99                        | 0.43            | 0.01*       | 0.54                | 0.02*           | 0.22            |
| supramarginal          | 2.92          | 0.04    | 0.63                        | 0.73            | 0.03*       | > 0.99              | 0.28            | 0.14            |
| insula                 | 3.20          | 0.03    | 0.26                        | 0.14            | 0.02*       | > 0.99              | 0.53            | 0.42            |

\*indicates significant after multiple comparison (p < 0.05).

**Supplementary Table 2. Spearman correlation between cortical thickness and neuropsychological measurements for AD, aMCI-m, aMCI-s and NC groups.**

| cortical region       | AVLT |        | MMSE |        | MoCA |        | TMT   |        | BNT  |        |
|-----------------------|------|--------|------|--------|------|--------|-------|--------|------|--------|
|                       | r    | p      | R    | P      | r    | p      | r     | p      | r    | p      |
| entorhinal            | 0.54 | < 0.01 | 0.40 | < 0.01 | 0.45 | < 0.01 | -0.48 | < 0.01 | 0.49 | < 0.01 |
| fusiform              | 0.55 | 0.01   | 0.51 | < 0.01 | 0.54 | < 0.01 | -0.59 | < 0.01 | 0.62 | < 0.01 |
| inferior parietal     | 0.44 | < 0.01 | 0.34 | < 0.01 | 0.39 | < 0.01 | -0.31 | < 0.01 | 0.42 | < 0.01 |
| inferior temporal     | 0.53 | < 0.01 | 0.45 | < 0.01 | 0.46 | < 0.01 | -0.40 | < 0.01 | 0.54 | < 0.01 |
| isthmus cingulate     | 0.29 | < 0.01 | 0.42 | < 0.01 | 0.36 | < 0.01 | -0.34 | < 0.01 | 0.51 | < 0.01 |
| lateral orbitofrontal | 0.46 | < 0.01 | 0.35 | < 0.01 | 0.46 | < 0.01 | -0.44 | < 0.01 | 0.41 | < 0.01 |
| lingual               | 0.35 | < 0.01 | 0.33 | < 0.01 | 0.33 | < 0.01 | -0.35 | < 0.01 | 0.37 | < 0.01 |
| medial orbitofrontal  | 0.42 | < 0.01 | 0.41 | < 0.01 | 0.41 | < 0.01 | -0.28 | 0.02   | 0.29 | < 0.01 |
| middle temporal       | 0.51 | < 0.01 | 0.43 | < 0.01 | 0.46 | < 0.01 | -0.50 | < 0.01 | 0.59 | < 0.01 |
| parahippocampal       | 0.46 | < 0.01 | 0.27 | 0.02   | 0.35 | < 0.01 | -0.27 | 0.02   | 0.32 | < 0.01 |
| pars opercularis      | 0.42 | < 0.01 | 0.35 | < 0.01 | 0.31 | < 0.01 | -0.28 | 0.02   | 0.37 | < 0.01 |
| pars triangularis     | 0.46 | < 0.01 | 0.27 | 0.02   | 0.37 | < 0.01 | -0.35 | < 0.01 | 0.41 | < 0.01 |
| precuneus             | 0.49 | < 0.01 | 0.39 | < 0.01 | 0.35 | < 0.01 | -0.34 | < 0.01 | 0.47 | < 0.01 |
| superior parietal     | 0.44 | < 0.01 | 0.38 | < 0.01 | 0.39 | < 0.01 | -0.24 | 0.04   | 0.34 | < 0.01 |
| superior temporal     | 0.52 | < 0.01 | 0.37 | < 0.01 | 0.41 | < 0.01 | -0.41 | < 0.01 | 0.56 | < 0.01 |
| supramarginal         | 0.43 | < 0.01 | 0.27 | 0.02   | 0.29 | 0.01   | -0.24 | 0.04   | 0.35 | < 0.01 |
| insula                | 0.59 | < 0.01 | 0.33 | < 0.01 | 0.41 | < 0.01 | -0.45 | < 0.01 | 0.49 | < 0.01 |

  

| cortical region       | AVLT |        | MMSE |        | MoCA |        | TMT   |        | BNT  |        |
|-----------------------|------|--------|------|--------|------|--------|-------|--------|------|--------|
|                       | r    | p      | r    | p      | r    | p      | r     | p      | r    | p      |
| entorhinal            | 0.61 | < 0.01 | 0.42 | < 0.01 | 0.50 | < 0.01 | -0.53 | < 0.01 | 0.56 | < 0.01 |
| fusiform              | 0.65 | < 0.01 | 0.49 | < 0.01 | 0.49 | < 0.01 | -0.49 | < 0.01 | 0.62 | < 0.01 |
| inferior parietal     | 0.40 | < 0.01 | 0.30 | 0.01   | 0.30 | 0.01   | -0.23 | 0.05   | 0.36 | < 0.01 |
| inferior temporal     | 0.50 | < 0.01 | 0.37 | < 0.01 | 0.41 | < 0.01 | -0.40 | < 0.01 | 0.48 | < 0.01 |
| lateral orbitofrontal | 0.48 | < 0.01 | 0.30 | < 0.01 | 0.39 | < 0.01 | -0.33 | < 0.01 | 0.33 | < 0.01 |
| lingual               | 0.33 | < 0.01 | 0.25 | 0.03   | 0.26 | 0.03   | -0.25 | 0.04   | 0.33 | < 0.01 |
| middle temporal       | 0.48 | < 0.01 | 0.29 | 0.01   | 0.41 | < 0.01 | -0.35 | < 0.01 | 0.45 | < 0.01 |
| parahippocampal       | 0.45 | < 0.01 | 0.30 | 0.01   | 0.33 | < 0.01 | -0.25 | 0.04   | 0.32 | < 0.01 |
| pars opercularis      | 0.44 | < 0.01 | 0.38 | < 0.01 | 0.44 | < 0.01 | -0.24 | 0.04   | 0.30 | < 0.01 |
| precuneus             | 0.50 | < 0.01 | 0.51 | < 0.01 | 0.46 | < 0.01 | -0.35 | < 0.01 | 0.48 | < 0.01 |
| superior temporal     | 0.52 | < 0.01 | 0.29 | 0.01   | 0.37 | < 0.01 | -0.38 | < 0.01 | 0.52 | < 0.01 |

The table lists the high correlation cortical regions with corresponding neuropsychological measurements ( $p < 0.05$ ). The above one is left hemisphere and the below one is right hemisphere.
